# Supplementary material
Source: PubMed Central journal article supplement (PMC9288154)
Supplement: NIHMS1820578-supplement-Supporting_Information.pdf [file NIHMS1820578-supplement-Supporting_Information.pdf]

## Supporting Information

### Multidimensional Separations of Intact Phase II Steroid Metabolites Utilizing LC-Ion Mobility-HRMS

Don E. Davis, Jr.<sup>1</sup>, Katrina L. Leaptrot<sup>1</sup>, David C. Koomen<sup>1</sup>, Jody C. May<sup>1</sup>, Gustavo de A. Cavalcanti<sup>2</sup>, Monica C. Padilha<sup>2</sup>, Henrique M.G. Pereira<sup>2</sup>, and John A. McLean<sup>1\*</sup>

<sup>1</sup>Department of Chemistry, Center for Innovative Technology, Institute of Chemical Biology, Institute for Integrative Biosystems Research and Education, Vanderbilt-Ingram Cancer Center, Vanderbilt University, Nashville, Tennessee, 37235, United States

<sup>2</sup>Brazilian Doping Control Laboratory– LBCD – Chemistry Institute – Federal University of Rio de Janeiro – UFRJ, Rio de Janeiro, RJ, 21941-598, Brazil

\*Corresponding Author Email: [john.a.mclean@vanderbilt.edu](mailto:john.a.mclean@vanderbilt.edu)

#### ***Comments on LC-IM-MS instrument settings and data presented in this work***

In this supporting information, we provide tables for steroids, RPLC settings, source settings, DTIMS settings, figures for the novel/synthesized AAS investigated in human urine, LC-IM-HRMS isomer analysis, and conformational space analysis.

#### **Table of Contents**

**P2** – Table S1: 22 AASs separated by isomer groups with annotated features

**P3** – Table S2: LC-IM-MS RPLC settings, source settings, and DTIMS settings

**P4** – Figure S1: AAS investigated in human urine (Epi-THMT S3)

**P5** – Figure S2: AASs Conformational space analysis (CCS values vs.  $m/z$ ) separated by metabolite groups

**P6**– Figure S3: AASs Conformational space analysis (CCS values vs.  $m/z$ ) not separated by metabolite groups

**P7** – Figure S4: Isomeric AASs LC chromatograms and ion mobility traces

**P8-P11** – Table S2-S5: Statistical analyses for isomeric AASs

**P12** – References

**Table S1.** AASs separated by isomer groups, neutral formulas, neutral exact mass, adduct exact mass, retention time (RT) using the 15 minute method, elution order annotation, RT CV%, collision cross sections ( $\text{\AA}^2$ ), and CCS CV% ( $n = 3$  technical replicates over 3 different days at  $5 \mu\text{g/mL}$ ). The color coordination is for isomer types described throughout this manuscript.

| <u>AAS</u>                                   | <u>Formula</u>                                                | <u>Exact Mass</u> | <u>[M-H]<sup>-</sup></u> | <u>Elution #</u> | <u>RT (min)</u> | <u>RT CV%</u> | <u>CCS</u> | <u>CCS CV%</u> |
|----------------------------------------------|---------------------------------------------------------------|-------------------|--------------------------|------------------|-----------------|---------------|------------|----------------|
| Epi-THMT S3                                  | C <sub>20</sub> H <sub>34</sub> O <sub>5</sub> S              | 386.213           | 385.205                  | 22               | 9.5             | 0.2           | 200.7      | 0.3            |
| Methenolone M1 G                             | C <sub>26</sub> H <sub>38</sub> O <sub>8</sub>                | 478.257           | 477.249                  | 18               | 6.4             | 0.2           | 217.6      | 0.1            |
| 7-Keto DHEA-3 S                              | C <sub>19</sub> H <sub>26</sub> O <sub>6</sub> S              | 382.145           | 381.137                  | 1                | 1.4             | 2.1           | 195.0      | 0.2            |
| Bolasterone M1 G                             | C <sub>27</sub> H <sub>44</sub> O <sub>8</sub>                | 496.304           | 495.296                  | 19               | 6.4             | 0.5           | 212.2      | 0.1            |
| EpiNandrolone S                              | C <sub>18</sub> H <sub>26</sub> O <sub>5</sub> S              | 354.150           | 353.142                  | 7                | 3.1             | 2.3           | 189.3      | 0.1            |
| Boldenone G                                  | C <sub>25</sub> H <sub>34</sub> O <sub>8</sub>                | 462.225           | 461.218                  | 5                | 2.8             | 2.3           | 217.4      | 0.1            |
| Prednisolone 21-S                            | C <sub>21</sub> H <sub>28</sub> O <sub>8</sub> S              | 440.151           | 439.143                  | 3                | 2.1             | 3.2           | 196.9      | 0.1            |
| Mesterolone M2 G                             | C <sub>26</sub> H <sub>42</sub> O <sub>8</sub>                | 482.288           | 481.280                  | 17               | 6.3             | 0.3           | 220.0      | 0.1            |
| Nandrolone G                                 | C <sub>24</sub> H <sub>34</sub> O <sub>8</sub>                | 450.225           | 449.218                  | 6                | 2.8             | 2.5           | 215.4      | 0.1            |
| Stanozolol 1'N - G                           | C <sub>27</sub> H <sub>40</sub> N <sub>2</sub> O <sub>7</sub> | 504.284           | 503.276                  | 10               | 4.1             | 1.4           | 231.0      | 0.1            |
| Stanozolol 3'OH G                            | C <sub>27</sub> H <sub>40</sub> N <sub>2</sub> O <sub>8</sub> | 520.279           | 519.271                  | 14               | 5               | 0.6           | 229.9      | 0.1            |
| <u>Constitutional Isomers</u>                |                                                               |                   |                          |                  |                 |               |            |                |
| 16 $\alpha$ -hydroxy DHEA 3-S                | C <sub>19</sub> H <sub>28</sub> O <sub>6</sub> S              | 384.161           | 383.153                  | 2                | 1.9             | 1.0           | 199.1      | 0.1            |
| 11-Ketoetiocholanolone S                     | C <sub>19</sub> H <sub>28</sub> O <sub>6</sub> S              | 384.161           | 383.153                  | 4                | 2.5             | 1.8           | 188.4      | 0.1            |
| 5 $\alpha$ -androstan-3 $\beta$ -ol-16-one S | C <sub>19</sub> H <sub>30</sub> O <sub>5</sub> S              | 370.181           | 369.174                  | 13               | 4.7             | 1.6           | 197.3      | 0.1            |
| Epitestosterone S                            | C <sub>19</sub> H <sub>28</sub> O <sub>5</sub> S              | 368.166           | 367.158                  | 9                | 4.1             | 2.1           | 193.0      | 0.03           |
| Mesterolone M1 G                             | C <sub>26</sub> H <sub>40</sub> O <sub>9</sub>                | 480.272           | 479.265                  | 20               | 7.3             | 0.3           | 217.8      | 0.1            |
| Drostanolone M1 G                            | C <sub>26</sub> H <sub>40</sub> O <sub>8</sub>                | 480.272           | 479.265                  | 21               | 8.5             | 0.3           | 218.7      | 0.1            |
| <u>Stereoisomers</u>                         |                                                               |                   |                          |                  |                 |               |            |                |
| Prasterone S (3 $\alpha$ )                   | C <sub>19</sub> H <sub>28</sub> O <sub>5</sub> S              | 368.166           | 367.158                  | 12               | 4.6             | 1.9           | 194.7      | 0.1            |
| Prasterone S (3 $\beta$ )                    | C <sub>19</sub> H <sub>28</sub> O <sub>5</sub> S              | 368.166           | 367.158                  | 8                | 3.9             | 1.1           | 196.4      | 0.2            |
| Epiandrosterone S                            | C <sub>19</sub> H <sub>30</sub> O <sub>5</sub> S              | 370.181           | 369.174                  | 11               | 4.5             | 2.1           | 197.4      | 0.1            |
| Androsterone S                               | C <sub>19</sub> H <sub>30</sub> O <sub>5</sub> S              | 370.181           | 369.174                  | 16               | 5.5             | 0.6           | 195.7      | 0.1            |
| Etiocholanolone S                            | C <sub>19</sub> H <sub>30</sub> O <sub>5</sub> S              | 370.181           | 369.174                  | 15               | 5.4             | 1.2           | 196.2      | 0.1            |

The following AASs are grouped by supplier where the common name corresponds to **Table S1** and the chemical name is provided in the parentheses. Epitestosterone S (4-androsten-17 $\alpha$ -ol-3-one sulphate), 7-Keto DHEA-3 S (5-androsten-3 $\beta$ -ol-7,17-dione sulphate), 16 $\alpha$ -hydroxy DHEA S (5-androsten-3 $\beta$ , 16 $\alpha$ -diol-17-one-3 sulphate), Prednisolone 21-S (1,4-pregnadien-11,17,21-triol-3,20-dione 21-sulphate), 11-Ketoetiocholanolone S (5 $\beta$ -androstan-3 $\alpha$ -ol-11,17-dione sulphate), Prasterone S (3 $\beta$ ) (5-androsten-3 $\beta$ -OL-17-one sulphate), Epiandrosterone S (5 $\alpha$ -androstan-3 $\beta$ -ol-17-one sulphate), Prasterone (3 $\alpha$ ) S (5-androsten-3 $\alpha$ -OL-17-one sulphate), 5 $\alpha$ -androstan-3 $\beta$ -ol-one S, Etiocholanolone S (5 $\beta$ -androstan-3 $\alpha$ -ol-17-one sulphate), and Androsterone S (5 $\alpha$ -androstan-3 $\alpha$ -ol-17-one sulphate) were purchased from Steraloids Inc. (Newport, RI, USA). Drostanolone M1 G (2 $\alpha$ -methyl-5 $\alpha$ -androstan-3 $\alpha$ -ol-17-one-3- $\beta$ -D-glucuronic acid), Methenolone M1 G (1-methylene-5 $\alpha$ -androstan-3 $\alpha$ -ol-17-one-3- $\beta$ -D-glucuronic acid), Mesterolone M1 G (1 $\alpha$ -methyl-5 $\alpha$ -androstan-3 $\alpha$ -ol-17-one-3- $\beta$ -D-glucuronic acid), Mesterolone M2 G (1 $\alpha$ -methyl-5 $\alpha$ -androstan-3 $\alpha$ ,17 $\beta$ -diol-3- $\beta$ -D-glucuronic acid), Boldenone G (1,4-androstadien-17 $\beta$ -diol-3-one-17- $\beta$ -D-glucuronic acid), Bolasterone M1 G (7 $\alpha$ ,17 $\alpha$ -dimethyl-5 $\beta$ -androstan-3 $\alpha$ ,17 $\beta$ -diol-3- $\beta$ -D-glucuronic acid), Stanozolol 3'OH G (5 $\alpha$ -androstan-[3,2-c] pyrazole-3',17 $\beta$ -diol-17 $\alpha$ -methyl-3'- $\beta$ -glucuronic acid), Nandrolone G (4-estren-17 $\beta$ -ol-3-one-17- $\beta$ -D-glucuronic acid), Epinandrolone S (17 $\alpha$ -sulfoxy-4-estren-3-one), 19-norandrosterone D4 G (2,2,4,4-d4-5 $\alpha$ -Estran-3 $\alpha$ -ol-17-one-3- $\beta$ -D-glucuronic acid), Testosterone D3 S (16,16,17 $\alpha$ -d3-17 $\beta$ -sulfoxy-androst-4-en-3-one) were purchased from The National Measurement Institute of Australia (NMIA). Epi-THMT S3 (3 $\alpha$ -sulfoxy-17 $\beta$ -methyl-5 $\beta$ -androstan-17 $\alpha$ -ol) was a kind gift from the Institute Hospital del Mar d'Investigacions Mèdiques (IMIM) (Barcelona, Spain). Stanozolol 1'N-G (5 $\alpha$ -androstan-[3,2-c] pyrazole-3',17 $\beta$ -diol-17 $\alpha$ -methyl-1'N-glucuronic acid) was provided by Seibersdorf Laboratories (Austria).

**Table S2:** LC-IM-HRMS parameters used to collect the steroid data in our work. Source settings for the Agilent Jet Stream ESI and chromatographic conditions were optimized specifically for this study using Agilent 1290 I (LC) and 6560 (DTIMS-HRMS) instruments.

| RPLC Settings    |                        |                                            |
|------------------|------------------------|--------------------------------------------|
| Parameter        | Value                  | Units                                      |
| Column           | Waters ACQUITY BEH C18 | 2.1 x 75 mm (1.7 $\mu$ m)                  |
| Temperature      | 45                     | Celsius                                    |
| Injection Volume | 10                     | $\mu$ L                                    |
| Flow Rate        | 0.400                  | mL/min                                     |
| Mobile Phase (A) | H <sub>2</sub> O       | 1 mM ammonium formate/<br>0.1% formic acid |
| Mobile Phase (B) | MeOH                   | 1 mM ammonium formate/<br>0.1% formic acid |

| RPLC Settings |     |
|---------------|-----|
| Time (min)    | %B  |
| 0             | 45  |
| 1             | 45  |
| 9.5           | 70  |
| 10.5          | 100 |
| 12            | 100 |
| 13            | 45  |
| 15            | 45  |

| Source Settings          |       |         |
|--------------------------|-------|---------|
| Parameter                | Value | Units   |
| Gas Temp                 | 300   | Celsius |
| Drying Gas               | 12    | L/min   |
| Nebulizer                | 20    | psi     |
| Sheath Gas Temp          | 300   | Celsius |
| Sheath Gas Flow          | 12    | L/min   |
| Capillary Voltage (VCap) | 2000  | V       |
| Nozzle Voltage           | 500   | V       |

| RPLC Settings |     |
|---------------|-----|
| Time (min)    | %B  |
| 0             | 50  |
| 1             | 50  |
| 5.5           | 100 |
| 7             | 100 |
| 8             | 50  |
| 10            | 50  |

| DTIMS-MS Single Pulse Settings |         |                          |
|--------------------------------|---------|--------------------------|
| Parameter                      | Value   | Units                    |
| Mass Range                     | 50-1700 | m/z                      |
| Trap Fill Time                 | 20000   | $\mu$ s                  |
| Trap Release Time              | 180     | $\mu$ s                  |
| Frame Rate                     | 0.9     | Frames/sec               |
| IM Transient Rate              | 14      | IM Transients/Frame      |
| Max Drift Time                 | 60      | ms                       |
| TOF Transient Rate             | 600     | Transients/IM Transients |
| Drift Tube Entrance            | -1474   | V                        |
| Drift Tube Exit                | -224    | V                        |
| Rear Funnel Entrance           | -217.5  | V                        |
| Rear Funnel Exit               | -45     | V                        |

| DTIMS-MS Ion multiplexing Settings |         |                          |
|------------------------------------|---------|--------------------------|
| Parameter                          | Value   | Units                    |
| Mass Range                         | 50-1700 | m/z                      |
| Trap Fill Time                     | 3900    | $\mu$ s                  |
| Trap Release Time                  | 180     | $\mu$ s                  |
| Frame Rate                         | 0.9     | Frames/sec               |
| IM Transient Rate                  | 18      | IM Transients/Frame      |
| Max Drift Time                     | 60      | ms                       |
| TOF Transient Rate                 | 600     | Transients/IM Transients |
| Drift Tube Entrance                | -1474   | V                        |
| Drift Tube Exit                    | -224    | V                        |
| Rear Funnel Entrance               | -217.5  | V                        |
| Rear Funnel Exit                   | -45     | V                        |

**Figure S1.** Anabolic androgenic steroid investigated in human urine (top table). A calibration curve (left) showing the lower dynamic range from 0.5 ppb to 10 ppb with the gold dashed lines representing the 95% confidence interval. Standard error bars ( $n = 3$  intraday technical replicates) were used to demonstrate variation in both peak area and concentration. A table is provided to the right of the calibration curve to provide expected concentrations, normalized peak areas, standard deviations, calculated concentrations, and analytical figures of merit (e.g., precision by %CV, accuracy by %bias, and LOQ). Also, a residual error versus concentration plot was provided to evaluate the validity of the linear regression model.

| Analyte                          | LOQ (ng/mL) | Formula            | Exact m/z | Adduct         | Exp. m/z | Mass error (ppm) | IM drift time (ms) | CCS ( $\text{\AA}^2$ ) | CCS %diff standard vs sample |
|----------------------------------|-------------|--------------------|-----------|----------------|----------|------------------|--------------------|------------------------|------------------------------|
| Epi-THMT S3 (human urine sample) | 1           | $C_{20}H_{31}O_4S$ | 367.194   | $[M-H_2O-H]^-$ | 367.193  | -3.5             | 28.56              | 200.8                  | 0.3                          |

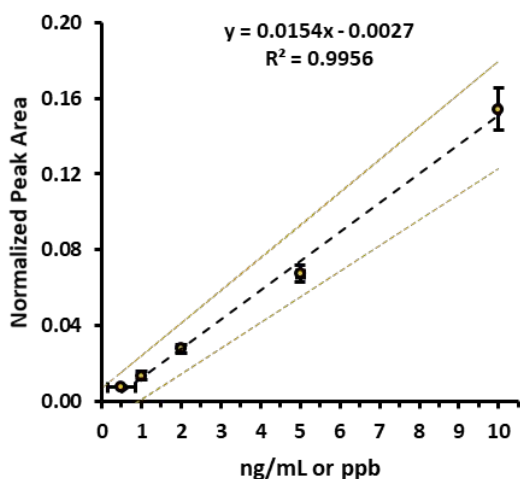

| [expected] (ppb) | normalized peak area | %CV  | [calculated] (ppb) | %bias |     |
|------------------|----------------------|------|--------------------|-------|-----|
| 0.5              | 0.0076               | 8.5% | 0.67               | -34%  | LOD |
| 1.0              | 0.0137               | 15%  | 1.06               | -6.4% | LOQ |
| 2.0              | 0.0279               | 7.6% | 1.99               | 0.7%  |     |
| 5.0              | 0.0673               | 6.6% | 4.55               | 9.1%  |     |
| 10               | 0.1541               | 7.2% | 10.2               | -1.8% |     |

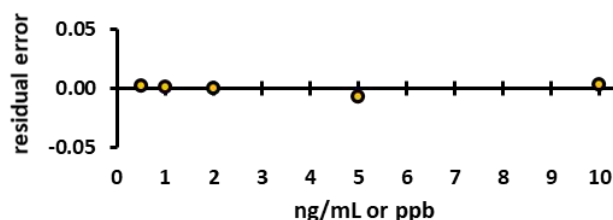

**AAS in Human Urine.** To evaluate the fitness for purpose of our LC-IM-HRMS method, urine samples spiked with Epi-THMT S3 were tested after the SPE extraction protocol described in the Methods section (**Figure S1**). This metabolite was assessed at several low concentration levels to demonstrate analytical figures of merit, such as limits of detection and quantification limits in human urine, shown in **Figure S1**. In addition to ppb level quantification/linearity, high mass measurement accuracy, and retention time alignment afforded by our instrument setup, observed CCS values for Epi-THMT S3 in the human urine samples are in good agreement with CCS values from neat standards analyzed on different days (typically <0.5% difference) as shown in **Figure S1**. These results illustrate the potential benefits of adding the IMS separation to current analytic workflows in routine testing laboratories performing urine analyses, especially for anti-doping purposes.

**Figure S2.** Conformational space analysis showing CCS values for the phase II steroids investigated using LC-IM-HRMS with neat standards. Included is a blue dashed trendline, fit to a power function, representing the best fit line of the sulfated data and the orange trendline represents glucuronide data. Also shown are red dashed lines representing  $\pm 10\%$  deviation from the best fit line for sulfated data and green dashed lines representing  $\pm 10\%$  deviation from the best fit line for glucuronide data. Measured phase II steroids were within  $\pm 10\%$  of the best fit line. Error bars represent standard errors and are for most values within the scale of the marker ( $n = 3$  technical replicates over 3 different days at  $5 \mu\text{g/mL}$ ). The gray data points represent  $\sim 5000$ - $9000$  entries from blank human urine.

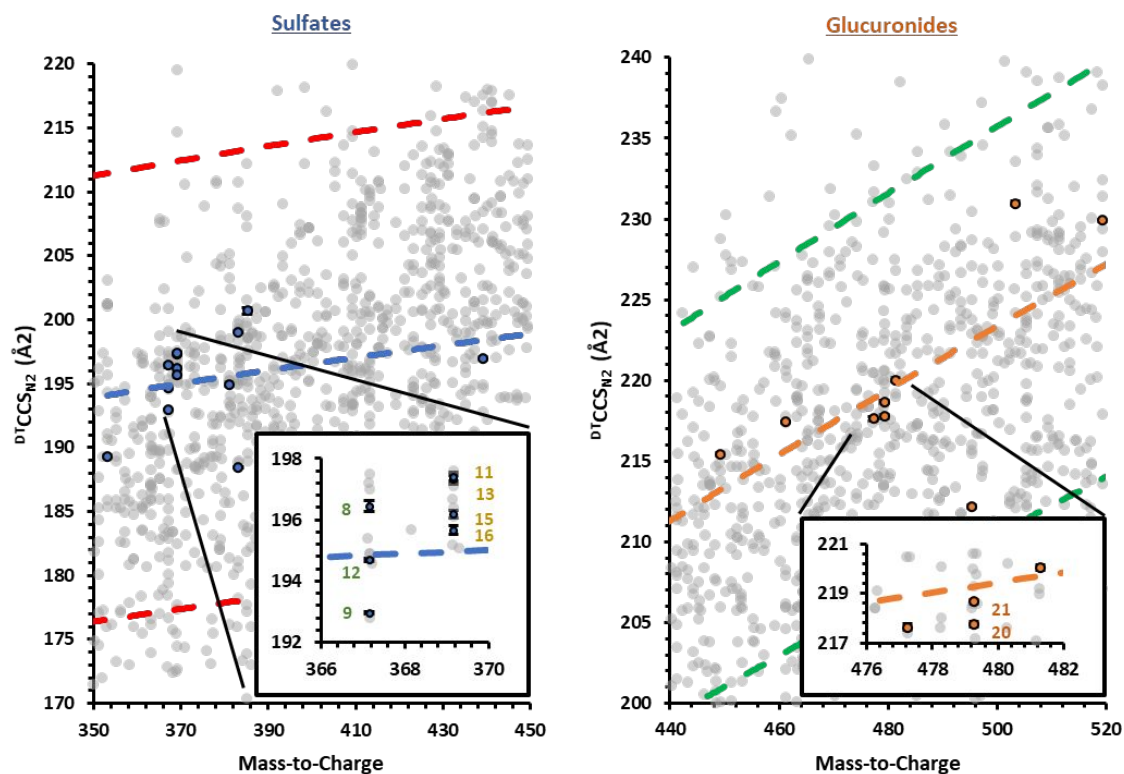

Separation of isomeric AAS via LC-IM-HRMS can also be observed in **Figure S2**. The data in **Figure S2** exemplify the presence of unique mass-mobility correlations with  $\pm 10\%$  deviation from the best fit line for 13 sulfate AASs and for 9 glucuronide AASs. This differentiation demonstrates the structural properties of AAS and lays the groundwork for using CCS measurements as an identifier in untargeted and/or targeted AAS studies.<sup>2</sup> Taken together, LC-IM-HRMS data strengthen the confidence in identifying AAS in a complex biological matrix and offers a characterization strategy of potentially unknown or known structurally similar steroids or steroid-like compounds in urine as chromatographically coeluting interferences.

**Figure S3.** Conformational space analyses showing CCS values for the phase II steroids investigated using LC-IM-HRMS with neat standards. Included is a blue dashed trendline, fit to a power function, representing the best fit line of the sulfate data and the orange trendline represents glucuronide data. The boxes are for isomer groups. Error bars represent standard errors and are for most values within the scale of the marker ( $n = 3$  technical replicates over 3 different days at 5  $\mu\text{g/mL}$ ). The gray data points represent  $\sim 5000$ - $9000$  entries from blank human urine.

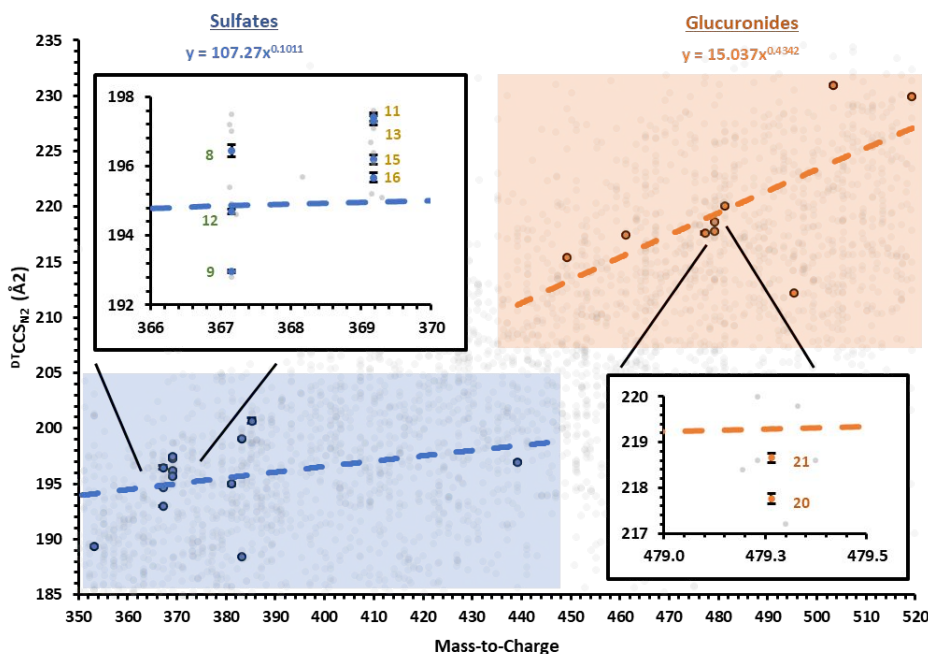

**Mass-Mobility Correlations.** This study's primary objectives were to determine CCS values of known AAS standards and develop correlations between mass and CCS values for two of the main AAS phase II metabolite groups (sulfonic acid and glucuronic acid). The fused ring sterol core, common to these AAS, has no rotational freedom. Therefore, the variability in CCS values is introduced by ketones, double bonds, a pyrazole ring, and stereochemistry of proton, methyl, hydroxyl, sulfate, and glucuronide functional groups. AASs cluster in CCS vs.  $m/z$  conformational space based on their structural similarity (**Figure S3**). The AAS sulfate-conjugates exhibited the smaller CCS values, likely resulting from this group possessing a smaller sulfonic acid functional group than the glucuronides. The IMS resolving power was able to demonstrate different CCS values between most compounds within isomer sets (color coordinating in **Table 1** and **Figure 1**). The AAS glucuronide-conjugates exhibited larger CCS values, likely because of the larger glucuronic acid functional groups.

Utilizing the CCS values reported here, we can develop correlations similar to those used by Picache et al. in the Unified CCS Compendium by mapping expected mobility-mass space for AAS phase II metabolites.<sup>2</sup> Our AAS data is plotted using a power fit. This correlation is representative of AAS phase II metabolites (sulfate and glucuronide). By reporting an AAS correlation generated from standard reference materials (**Figure S3**) and using it to identify known and unknown AAS in human samples CCS values in future studies, we can increase AAS annotation confidence.<sup>3</sup> Utilizing the information gained from the trendline classification of AAS phase II metabolites shows great promise for identifying new and emerging AASs by plotting their  $m/z$  and CCS values. All values fall within  $\pm 10\%$  of the calculated correlation, demonstrating its use for potentially identifying AAS phase II metabolite unknowns.

**Figure S4.** (A) LC-IM-MS analyses showing an LC chromatogram of 11 isomeric phase II AASs in the liquid phase. (B) LC-IM-MS analyses showing experimental DTIMS traces (ms) of 11 isomeric phase II AASs in the gas phase.

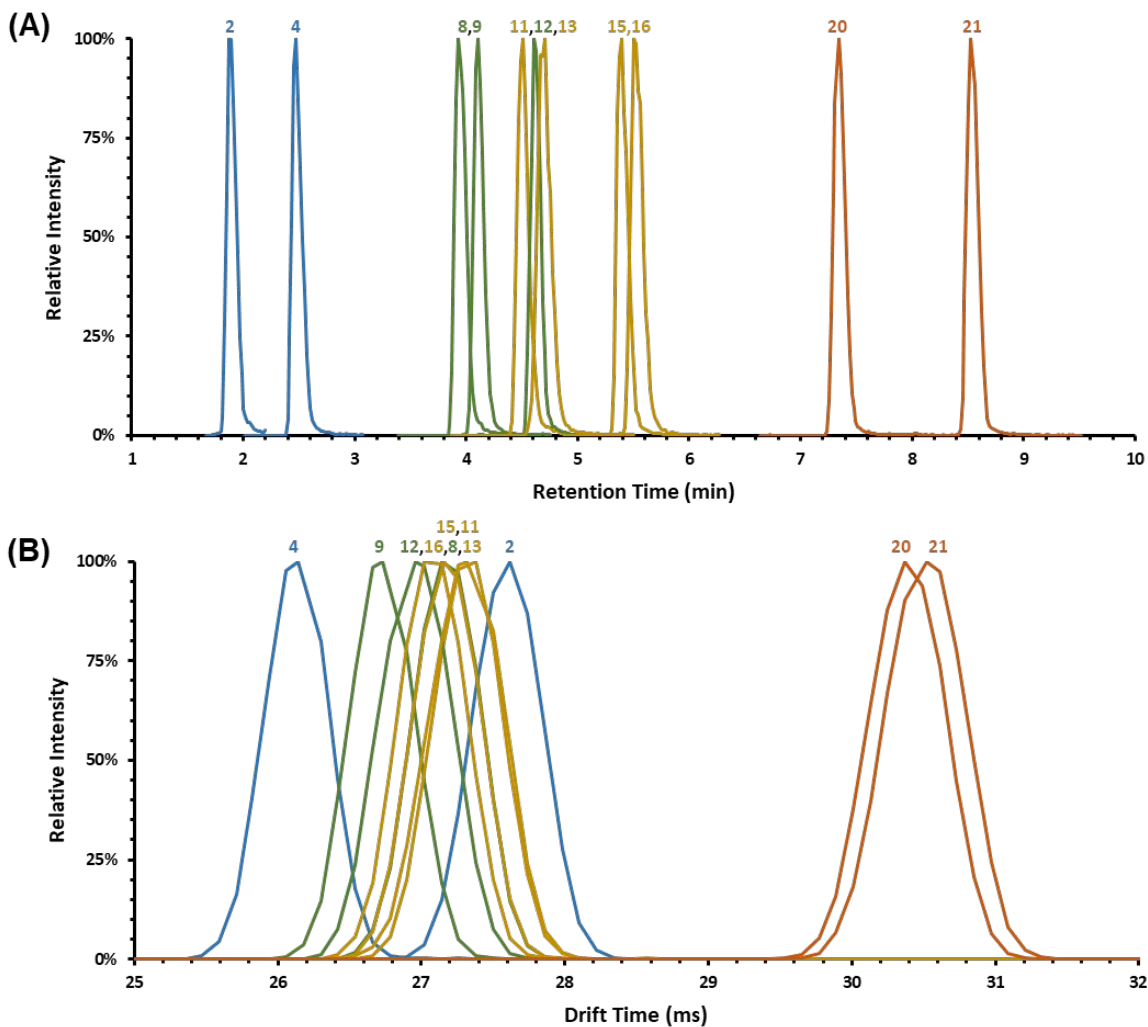

**Table S3.** P-values for sulfate isomeric retention times and collision cross section values ((2) 16alpha-hydroxy DHEA 3-S and (4) 11-Ketoetiocholanolone S), calculated by t-tests.

|                                     | Sulfate Isomers RT values    |              |      |   |   |
|-------------------------------------|------------------------------|--------------|------|---|---|
| Column B                            | (4) 11-Ketoetiocholanolone S |              |      |   |   |
| vs.                                 | vs.                          |              |      |   |   |
| Column A                            | (2) 16alpha-hydroxy DHEA 3-S |              |      |   |   |
| Unpaired t test                     |                              |              |      |   |   |
| P value                             | < 0.0001                     |              |      |   |   |
| P value summary                     | ****                         |              |      |   |   |
| Significantly different? (P < 0.05) | Yes                          |              |      |   |   |
| One- or two-tailed P value?         | Two-tailed                   |              |      |   |   |
| t                                   | df                           | t=20.88 df=4 |      |   |   |
| How big is the difference?          |                              |              |      |   |   |
| Mean ± SEM of column A              | 1.853 ± 0.01074 N=3          |              |      |   |   |
| Mean ± SEM of column B              | 2.434 ± 0.02567 N=3          |              |      |   |   |
| Difference between means            | 0.5810 ± 0.02782             |              |      |   |   |
| 95% confidence interval             | 0.5037 to 0.6582             |              |      |   |   |
| R square                            | 0.9909                       |              |      |   |   |
| F test to compare variances         |                              |              |      |   |   |
| F                                   | DFn                          | Dfd          | 5.71 | 2 | 2 |
| P value                             | 0.2981                       |              |      |   |   |
| P value summary                     | ns                           |              |      |   |   |
| Significantly different? (P < 0.05) | No                           |              |      |   |   |

|                                     | Sulfate Isomers CCS values   |              |      |   |   |
|-------------------------------------|------------------------------|--------------|------|---|---|
| Column B                            | (4) 11-Ketoetiocholanolone S |              |      |   |   |
| vs.                                 | vs.                          |              |      |   |   |
| Column A                            | (2) 16alpha-hydroxy DHEA 3-S |              |      |   |   |
| Unpaired t test                     |                              |              |      |   |   |
| P value                             | < 0.0001                     |              |      |   |   |
| P value summary                     | ****                         |              |      |   |   |
| Significantly different? (P < 0.05) | Yes                          |              |      |   |   |
| One- or two-tailed P value?         | Two-tailed                   |              |      |   |   |
| t                                   | df                           | t=77.12 df=4 |      |   |   |
| How big is the difference?          |                              |              |      |   |   |
| Mean ± SEM of column A              | 199.1 ± 0.1202 N=3           |              |      |   |   |
| Mean ± SEM of column B              | 188.5 ± 0.06667 N=3          |              |      |   |   |
| Difference between means            | -10.60 ± 0.1374              |              |      |   |   |
| 95% confidence interval             | -10.98 to -10.22             |              |      |   |   |
| R square                            | 0.9993                       |              |      |   |   |
| F test to compare variances         |                              |              |      |   |   |
| F                                   | DFn                          | Dfd          | 3.25 | 2 | 2 |
| P value                             | 0.4706                       |              |      |   |   |
| P value summary                     | ns                           |              |      |   |   |
| Significantly different? (P < 0.05) | No                           |              |      |   |   |



**Table S4.** P-values for glucuronide isomeric retention times and collision cross section values ((20) Mesterolone M1 G and (21) Drostanolone M1 G), calculated by t-tests.

| Table Analyzed                      | Glucuronide Isomers RT values |              |     |   |   |  |
|-------------------------------------|-------------------------------|--------------|-----|---|---|--|
| Column B                            | (21) Drostanolone M1 G        |              |     |   |   |  |
| vs.                                 | vs.                           |              |     |   |   |  |
| Column A                            | (20) Mesterolone M1 G         |              |     |   |   |  |
| Unpaired t test                     |                               |              |     |   |   |  |
| P value                             | < 0.0001                      |              |     |   |   |  |
| P value summary                     | ****                          |              |     |   |   |  |
| Significantly different? (P < 0.05) | Yes                           |              |     |   |   |  |
| One- or two-tailed P value?         | Two-tailed                    |              |     |   |   |  |
| t                                   | df                            | t=69.96 df=4 |     |   |   |  |
| How big is the difference?          |                               |              |     |   |   |  |
| Mean ± SEM of column A              | 7.366 ± 0.01131 N=3           |              |     |   |   |  |
| Mean ± SEM of column B              | 8.540 ± 0.01239 N=3           |              |     |   |   |  |
| Difference between means            | 1.173 ± 0.01677               |              |     |   |   |  |
| 95% confidence interval             | 1.127 to 1.220                |              |     |   |   |  |
| R square                            | 0.9992                        |              |     |   |   |  |
| F test to compare variances         |                               |              |     |   |   |  |
| F                                   | DFn                           | Dfd          | 1.2 | 2 | 2 |  |
| P value                             | 0.9092                        |              |     |   |   |  |
| P value summary                     | ns                            |              |     |   |   |  |
| Significantly different? (P < 0.05) | No                            |              |     |   |   |  |

| Table Analyzed                      | Glucuronide Isomers CCS values |              |       |   |   |  |
|-------------------------------------|--------------------------------|--------------|-------|---|---|--|
| Column B                            | (21) Drostanolone M1 G         |              |       |   |   |  |
| vs.                                 | vs.                            |              |       |   |   |  |
| Column A                            | (20) Mesterolone M1 G          |              |       |   |   |  |
| Unpaired t test                     |                                |              |       |   |   |  |
| P value                             | 0.0101                         |              |       |   |   |  |
| P value summary                     | *                              |              |       |   |   |  |
| Significantly different? (P < 0.05) | Yes                            |              |       |   |   |  |
| One- or two-tailed P value?         | Two-tailed                     |              |       |   |   |  |
| t                                   | df                             | t=4.596 df=4 |       |   |   |  |
| How big is the difference?          |                                |              |       |   |   |  |
| Mean ± SEM of column A              | 217.8 ± 0.1453 N=3             |              |       |   |   |  |
| Mean ± SEM of column B              | 218.6 ± 0.1202 N=3             |              |       |   |   |  |
| Difference between means            | 0.8667 ± 0.1886                |              |       |   |   |  |
| 95% confidence interval             | 0.3431 to 1.390                |              |       |   |   |  |
| R square                            | 0.8408                         |              |       |   |   |  |
| F test to compare variances         |                                |              |       |   |   |  |
| F                                   | DFn                            | Dfd          | 1.461 | 2 | 2 |  |
| P value                             | 0.8125                         |              |       |   |   |  |
| P value summary                     | ns                             |              |       |   |   |  |
| Significantly different? (P < 0.05) | No                             |              |       |   |   |  |

**Table S5.** P-values for sulfate isomeric retention times and collision cross section values ((8) Prasterone S (3beta), (9) Epitestosterone S, (12) Prasterone S (3alpha)), calculated by ANOVA followed by Tukey's corrections for multiple comparisons. ns stands for not significant.

| Number of families                                      | 1          | Sulfate Isomers RT values |              |             |                  |    |       |    |
|---------------------------------------------------------|------------|---------------------------|--------------|-------------|------------------|----|-------|----|
| Number of comparisons per family                        | 3          |                           |              |             |                  |    |       |    |
| Alpha                                                   | 0.05       |                           |              |             |                  |    |       |    |
| Tukey's multiple comparisons test                       | Mean Diff. | 95% CI of diff.           | Significant? | Summary     | Adjusted P Value |    |       |    |
| (8) Prasterone S (3beta) vs. (9) Epitestosterone S      | -0.1185    | -0.2841 to 0.04709        | No           | ns          | 0.1635           |    |       |    |
| (8) Prasterone S (3beta) vs. (12) Prasterone S (3alpha) | -0.6146    | -0.7802 to -0.4490        | Yes          | ****        | < 0.0001         |    |       |    |
| (9) Epitestosterone S vs. (12) Prasterone S (3alpha)    | -0.4961    | -0.6494 to -0.3428        | Yes          | ****        | < 0.0001         |    |       |    |
| Test details                                            | Mean 1     | Mean 2                    | Mean Diff.   | SE of diff. | n1               | n2 | q     | DF |
| (8) Prasterone S (3beta) vs. (9) Epitestosterone S      | 3.88       | 3.999                     | -0.1185      | 0.05795     | 3                | 4  | 2.892 | 8  |
| (8) Prasterone S (3beta) vs. (12) Prasterone S (3alpha) | 3.88       | 4.495                     | -0.6146      | 0.05795     | 3                | 4  | 15    | 8  |
| (9) Epitestosterone S vs. (12) Prasterone S (3alpha)    | 3.999      | 4.495                     | -0.4961      | 0.05365     | 4                | 4  | 13.08 | 8  |

| Number of families                                      | 1          | Sulfate Isomers CCS values |              |             |                  |    |       |    |
|---------------------------------------------------------|------------|----------------------------|--------------|-------------|------------------|----|-------|----|
| Number of comparisons per family                        | 3          |                            |              |             |                  |    |       |    |
| Alpha                                                   | 0.05       |                            |              |             |                  |    |       |    |
| Tukey's multiple comparisons test                       | Mean Diff. | 95% CI of diff.            | Significant? | Summary     | Adjusted P Value |    |       |    |
| (8) Prasterone S (3beta) vs. (9) Epitestosterone S      | 3.467      | 2.932 to 4.001             | Yes          | ****        | < 0.0001         |    |       |    |
| (8) Prasterone S (3beta) vs. (12) Prasterone S (3alpha) | 1.733      | 1.199 to 2.268             | Yes          | ***         | 0.0001           |    |       |    |
| (9) Epitestosterone S vs. (12) Prasterone S (3alpha)    | -1.733     | -2.268 to -1.199           | Yes          | ***         | 0.0001           |    |       |    |
| Test details                                            | Mean 1     | Mean 2                     | Mean Diff.   | SE of diff. | n1               | n2 | q     | DF |
| (8) Prasterone S (3beta) vs. (9) Epitestosterone S      | 196.4      | 193                        | 3.467        | 0.1743      | 3                | 3  | 28.13 | 6  |
| (8) Prasterone S (3beta) vs. (12) Prasterone S (3alpha) | 196.4      | 194.7                      | 1.733        | 0.1743      | 3                | 3  | 14.07 | 6  |
| (9) Epitestosterone S vs. (12) Prasterone S (3alpha)    | 193        | 194.7                      | -1.733       | 0.1743      | 3                | 3  | 14.07 | 6  |

**Table S6.** P-values for sulfate isomeric retention times and collision cross section values ((11) Epiandrosterone S, (13) 5alpha-androstan-3beta-ol-16-one S, (15) Etiocholanolone S, and (16) Androsterone S), calculated by ANOVA followed by Tukey's corrections for multiple comparisons. ns stands for not significant.

| Number of families                                                 | 1          | Sulfate Isomers RT values |              |             |                  |    |       |    |
|--------------------------------------------------------------------|------------|---------------------------|--------------|-------------|------------------|----|-------|----|
| Number of comparisons per family                                   | 6          |                           |              |             |                  |    |       |    |
| Alpha                                                              | 0.05       |                           |              |             |                  |    |       |    |
| Tukey's multiple comparisons test                                  | Mean Diff. | 95% CI of diff.           | Significant? | Summary     | Adjusted P Value |    |       |    |
| (11) Epiandrosterone S vs. (13) 5alpha-androstan-3beta-ol-16-one S | -0.2079    | -0.3525 to -0.06323       | Yes          | **          | 0.0052           |    |       |    |
| (11) Epiandrosterone S vs. (15) Etiocholanolone S                  | -0.9292    | -1.074 to -0.7846         | Yes          | ****        | < 0.0001         |    |       |    |
| (11) Epiandrosterone S vs. (16) Androsterone S                     | -1.073     | -1.218 to -0.9283         | Yes          | ****        | < 0.0001         |    |       |    |
| (13) 5alpha-androstan-3beta-ol-16-one S vs. (15) Etiocholanolone S | -0.7213    | -0.8659 to -0.5767        | Yes          | ****        | < 0.0001         |    |       |    |
| (13) 5alpha-androstan-3beta-ol-16-one S vs. (16) Androsterone S    | -0.8651    | -1.010 to -0.7204         | Yes          | ****        | < 0.0001         |    |       |    |
| (15) Etiocholanolone S vs. (16) Androsterone S                     | -0.1437    | -0.2883 to 0.0008919      | No           | ns          | 0.0516           |    |       |    |
| Test details                                                       | Mean 1     | Mean 2                    | Mean Diff.   | SE of diff. | n1               | n2 | q     | DF |
| (11) Epiandrosterone S vs. (13) 5alpha-androstan-3beta-ol-16-one S | 4.385      | 4.593                     | -0.2079      | 0.04871     | 4                | 4  | 6.035 | 12 |
| (11) Epiandrosterone S vs. (15) Etiocholanolone S                  | 4.385      | 5.314                     | -0.9292      | 0.04871     | 4                | 4  | 26.98 | 12 |
| (11) Epiandrosterone S vs. (16) Androsterone S                     | 4.385      | 5.458                     | -1.073       | 0.04871     | 4                | 4  | 31.15 | 12 |
| (13) 5alpha-androstan-3beta-ol-16-one S vs. (15) Etiocholanolone S | 4.593      | 5.314                     | -0.7213      | 0.04871     | 4                | 4  | 20.94 | 12 |
| (13) 5alpha-androstan-3beta-ol-16-one S vs. (16) Androsterone S    | 4.593      | 5.458                     | -0.8651      | 0.04871     | 4                | 4  | 25.12 | 12 |
| (15) Etiocholanolone S vs. (16) Androsterone S                     | 5.314      | 5.458                     | -0.1437      | 0.04871     | 4                | 4  | 4.173 | 12 |

| Number of families                                                 | 1          | Sulfate Isomers CCS values |              |             |                  |    |        |    |
|--------------------------------------------------------------------|------------|----------------------------|--------------|-------------|------------------|----|--------|----|
| Number of comparisons per family                                   | 6          |                            |              |             |                  |    |        |    |
| Alpha                                                              | 0.05       |                            |              |             |                  |    |        |    |
| Tukey's multiple comparisons test                                  | Mean Diff. | 95% CI of diff.            | Significant? | Summary     | Adjusted P Value |    |        |    |
| (11) Epiandrosterone S vs. (13) 5alpha-androstan-3beta-ol-16-one S | 0.1333     | -0.5418 to 0.8084          | No           | ns          | 0.9187           |    |        |    |
| (11) Epiandrosterone S vs. (15) Etiocholanolone S                  | 1.233      | 0.5582 to 1.908            | Yes          | **          | 0.0017           |    |        |    |
| (11) Epiandrosterone S vs. (16) Androsterone S                     | 1.767      | 1.092 to 2.442             | Yes          | ***         | 0.0001           |    |        |    |
| (13) 5alpha-androstan-3beta-ol-16-one S vs. (15) Etiocholanolone S | 1.1        | 0.4249 to 1.775            | Yes          | **          | 0.0036           |    |        |    |
| (13) 5alpha-androstan-3beta-ol-16-one S vs. (16) Androsterone S    | 1.633      | 0.9582 to 2.308            | Yes          | ***         | 0.0003           |    |        |    |
| (15) Etiocholanolone S vs. (16) Androsterone S                     | 0.5333     | -0.1418 to 1.208           | No           | ns          | 0.1289           |    |        |    |
| Test details                                                       | Mean 1     | Mean 2                     | Mean Diff.   | SE of diff. | n1               | n2 | q      | DF |
| (11) Epiandrosterone S vs. (13) 5alpha-androstan-3beta-ol-16-one S | 197.4      | 197.3                      | 0.1333       | 0.2108      | 3                | 3  | 0.8944 | 8  |
| (11) Epiandrosterone S vs. (15) Etiocholanolone S                  | 197.4      | 196.2                      | 1.233        | 0.2108      | 3                | 3  | 8.273  | 8  |
| (11) Epiandrosterone S vs. (16) Androsterone S                     | 197.4      | 195.7                      | 1.767        | 0.2108      | 3                | 3  | 11.85  | 8  |
| (13) 5alpha-androstan-3beta-ol-16-one S vs. (15) Etiocholanolone S | 197.3      | 196.2                      | 1.1          | 0.2108      | 3                | 3  | 7.379  | 8  |
| (13) 5alpha-androstan-3beta-ol-16-one S vs. (16) Androsterone S    | 197.3      | 195.7                      | 1.633        | 0.2108      | 3                | 3  | 10.96  | 8  |
| (15) Etiocholanolone S vs. (16) Androsterone S                     | 196.2      | 195.7                      | 0.5333       | 0.2108      | 3                | 3  | 3.578  | 8  |

Reference:

- (1) May, J. C.; Knochenmuss, R.; Fjeldsted, J. C.; McLean, J. A. Resolution of Isomeric Mixtures in Ion Mobility Using a Combined Demultiplexing and Peak Deconvolution Technique. *Anal. Chem.* **2020**, *92* (14), 9482–9492. <https://doi.org/10.1021/acs.analchem.9b05718>.
- (2) Picache, J. A.; Rose, B. S.; Balinski, A.; Leaptrot, K. L.; Sherrod, S. D.; May, J. C.; McLean, J. A. Collision Cross Section Compendium to Annotate and Predict Multi-Omic Compound Identities. *Chem. Sci.* **2019**, *10* (4), 983–993. <https://doi.org/10.1039/c8sc04396e>.
- (3) Davis, D. E.; Sherrod, S. D.; Gant-Branum, R. L.; Colby, J. M.; McLean, J. A. Targeted Strategy to Analyze Antiepileptic Drugs in Human Serum by LC-MS/MS and LC-Ion Mobility-MS. *Anal. Chem.* **2020**, *92* (21), 14648–14656. <https://doi.org/10.1021/acs.analchem.0c03172>.
